# Supplementary material for: Identifying SARS-CoV-2 Variants of Concern through saliva-based RT-qPCR by targeting recurrent mutation sites
Source: PubMed Central journal article supplement (PMC8902870; doi:10.1101/2022.03.02.22271785), 2022-03-04
Supplement: NIHPP2022.03.02.22271785v1-supplement-7.pdf [file NIHPP2022.03.02.22271785v1-supplement-7.pdf]

**Supplemental Table 1.** Reaction efficiencies for all primer and probe sets in multiplex.

| RT-qPCR Assay | Multiplex Reaction Efficiency |                 |                             |
|---------------|-------------------------------|-----------------|-----------------------------|
|               | Internal Control Probe        | Reference Probe | Deletion/Substitution Probe |
| SΔ69-70       | 95.49%                        | 100.57%         | 97.12%                      |
| ORF1a         | 101.56%                       | 95.63%          | 101.44%                     |
| Δ3675-3677    |                               |                 |                             |
| K417T         | N/A                           | 101.97%         | 89.52%                      |
| E484K         | N/A                           | 99.04%          | 102.19%                     |
| E484Q         | N/A                           | 94.69%          | 101.40%                     |
| L452R         | N/A                           | 103.99%         | 112.04%                     |

**Supplemental Table 2.** Thermocycling Conditions for RT-qPCR assays.

| SΔ69-70 and ORF1aΔ3675-3677                         |                  |          |        |
|-----------------------------------------------------|------------------|----------|--------|
| Stage                                               | Temperature (°C) | Duration | Cycles |
| Warm Up                                             | 25.0             | 2 min    | 1      |
| Reverse Transcription                               | 50.0             | 15 min   | 1      |
| Initial Denaturation                                | 95.0             | 2 min    | 1      |
| Touchdown                                           | 95.0             | 3 sec    | 3      |
|                                                     | 72.0             | 30 sec   |        |
|                                                     | 95.0             | 3 sec    | 3      |
|                                                     | 68.0             | 30 sec   |        |
|                                                     | 95.0             | 3 sec    | 3      |
|                                                     | 64.0             | 30 sec   |        |
| Main Amplification                                  | 95.0             | 3 sec    | 45     |
|                                                     | 60.0             | 30 sec   |        |
| TaqPath SNP Assays (K417T, E484K, E484Q, and L452R) |                  |          |        |
| Stage                                               | Temperature (°C) | Duration | Cycles |
| Warm Up                                             | 25.0             | 2 min    | 1      |
| Reverse Transcription                               | 50.0             | 15 min   | 1      |
| Initial Denaturation                                | 95.0             | 2 min    | 1      |
| Main Amplification                                  | 95.0             | 3 sec    | 45     |
|                                                     | 60.0             | 30 sec   |        |

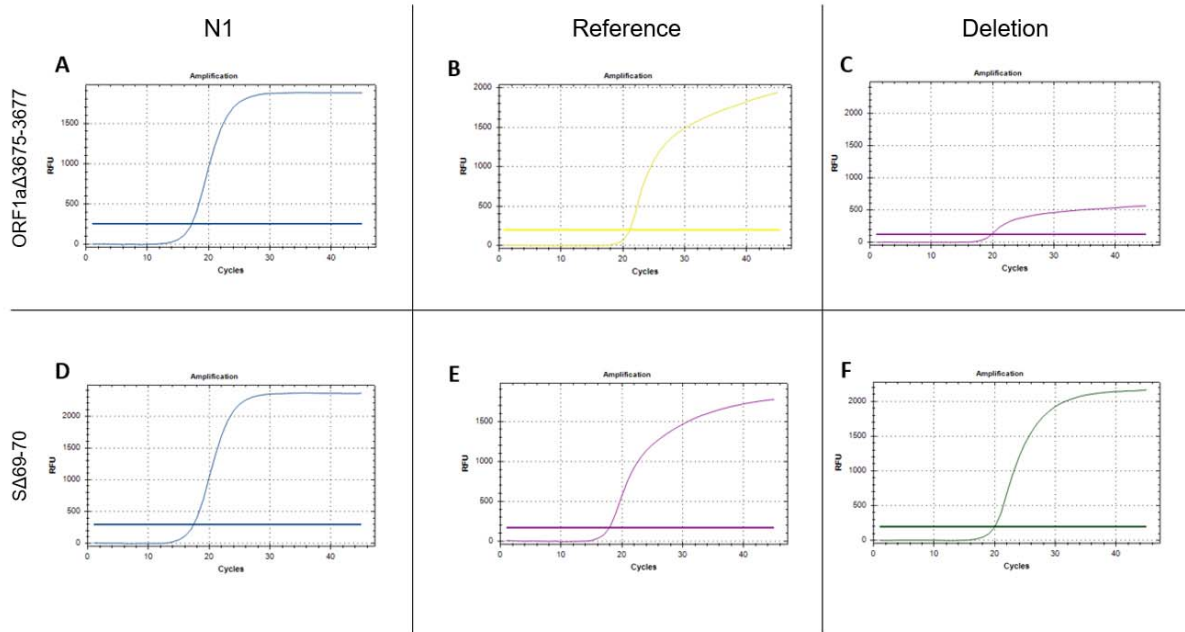

**Supplemental Figure 1.** Representative curves of RT-qPCR deletion assays.

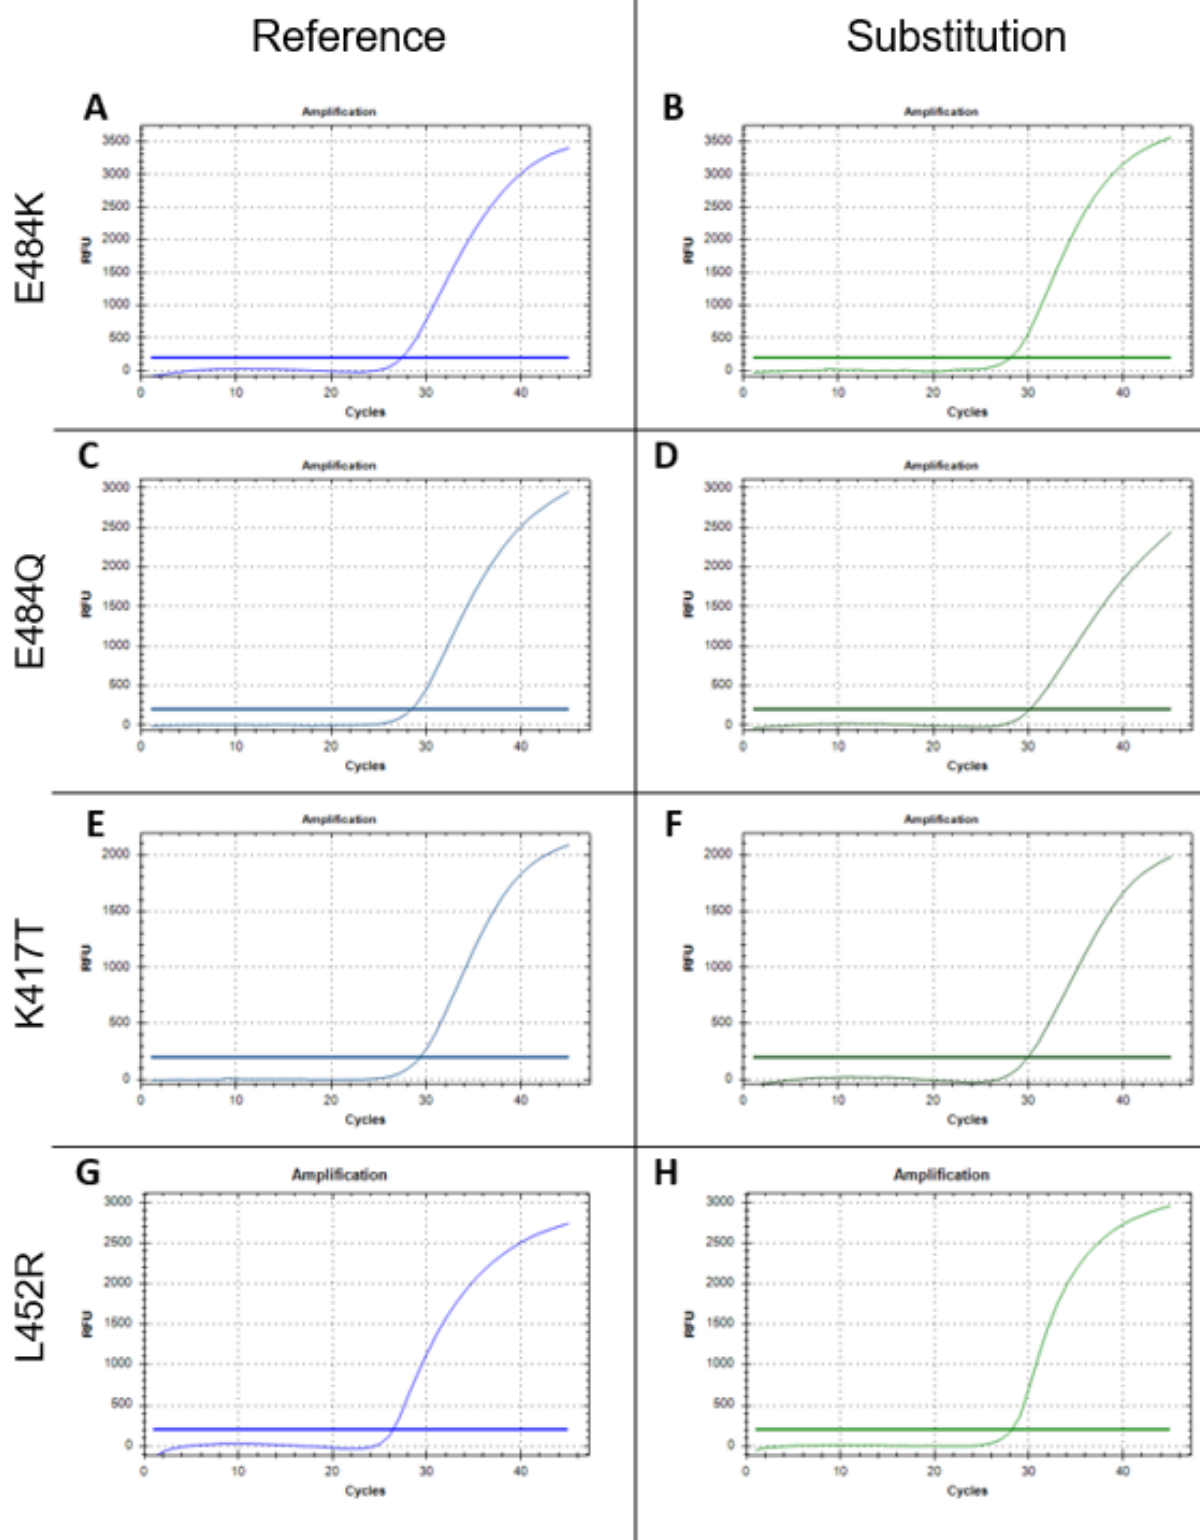

**Supplemental Figure 2.** Representative curves of TaqPath Spike SNP assays.

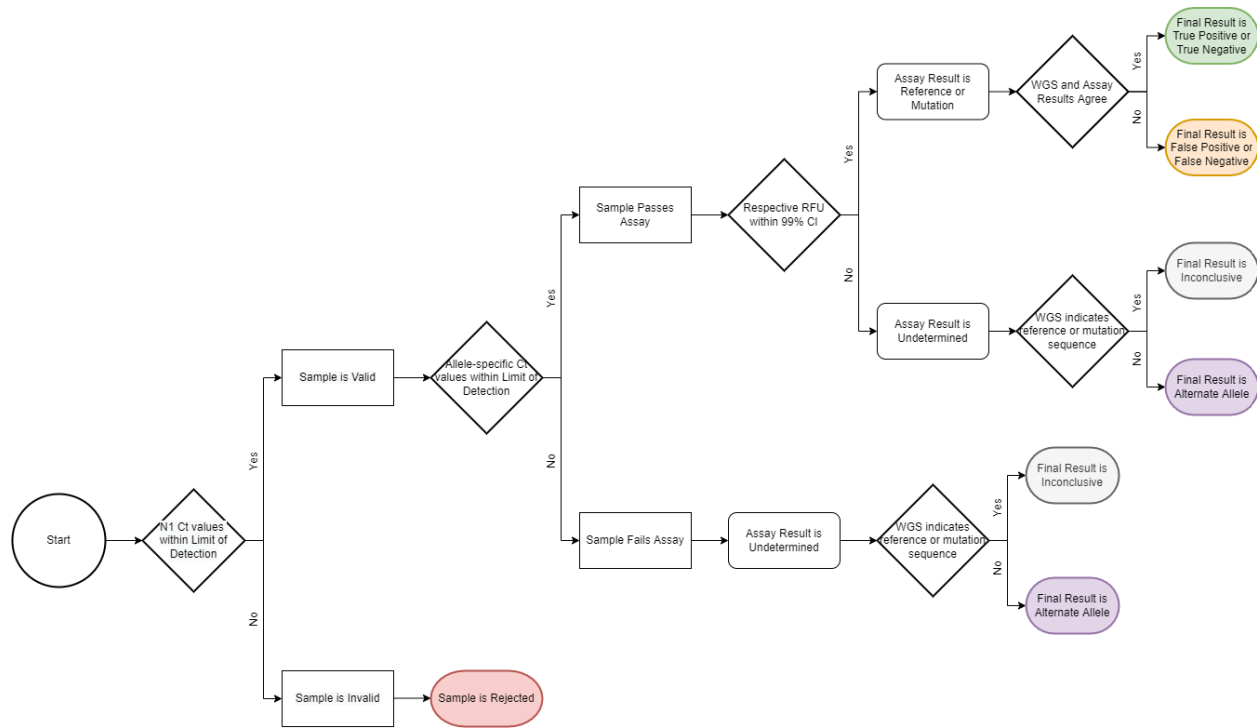

**Supplemental Figure 3. Sample Resulting Flowchart.**
